# Supplementary material for: High sequence-coverage detection of proteolytic peptides using a bis(terpyridine)ruthenium(ii) complex
Source: Royal Society of Chemistry journal article supplement (doi:10.1039/b610284k), 2007-01-01
Supplement: b610284k.pdf [file b610284k.pdf]

## Supplementary information:

### High sequence-coverage detection of proteolytic peptides using bis(terpyridine)ruthenium(II) complex

Akihiro Ito,<sup>a</sup> Taka-aki Okamura,\*<sup>a</sup> Ken Masui,<sup>a</sup> Maki Kaneko,<sup>a</sup> Ryoji Masui,<sup>b</sup> Kojiro Ake,<sup>b</sup> Seiki Kuramitsu,<sup>b</sup> Minoru Yamaguchi,<sup>c</sup> Hiroki Kuyama,<sup>c</sup> Eiji Ando,<sup>c</sup> Shigemi Norioka,<sup>d</sup> Takashi Nakazawa,<sup>e</sup> Susumu Tsunasawa,<sup>c</sup> Hitoshi Yamamoto<sup>a</sup> and Norikazu Ueyama\*<sup>a</sup>

<sup>a</sup> Department of Macromolecular Science, Graduate School of Science, Osaka University, Toyonaka, Osaka 560-0043 Japan.

<sup>b</sup> Department of Biology, Graduate School of Science, Osaka University, Toyonaka, Osaka 560-0043 Japan.

<sup>c</sup> Life Science Laboratory, Shimadzu Corporation, Kyoto 604-8511 Japan.

<sup>d</sup> Graduate School of Frontier Biosciences, Osaka University, Suita, Osaka 565-0871 Japan.

<sup>e</sup> Department of Chemistry, Nara Women's University, Nara 630-8506 Japan

**Table S1.** Predicted tryptic fragment ions of myoglobin and their mass number. The shading characters indicate basic amino acid residues. The underline indicates acidic amino acid residues. K\* in the amino acid sequences represents a homoarginine residue. The pI values were estimated by pI/MW prediction tool in Proteome of *Xylella fastidiosa*.<sup>a</sup> The all mass numbers are monoisotopic mass.

|                 | Sequence                                     | pI   | M      | <Ru>-CO-labeled |
|-----------------|----------------------------------------------|------|--------|-----------------|
| f <sub>1</sub>  | Y <u>LE</u> FISD <u>AI</u> IHV <u>L</u> HSK* | 5.99 | 1927.2 | 2596.9          |
| f <sub>2</sub>  | GLSD <u>G</u> E <u>W</u> QQV <u>L</u> NVWGK* | 4.37 | 1858.0 | 2527.7          |
| f <sub>3</sub>  | V <u>E</u> AD <u>I</u> AGHGQ <u>E</u> VLIR   | 4.65 | 1606.8 | 2260.5          |
| f <sub>4</sub>  | H <u>P</u> GNFGAD <u>A</u> QGAMTK*           | 6.74 | 1543.7 | 2213.4          |
| f <sub>5</sub>  | H <u>G</u> TVVLTALGGILK*                     | 8.76 | 1404.7 | 2074.4          |
| f <sub>6</sub>  | LFTGHP <u>E</u> TL <u>E</u> K*               | 5.40 | 1313.5 | 1983.2          |
| f <sub>7</sub>  | PLAQSHATK*                                   | 9.18 | 994.10 | 1663.8          |
| f <sub>8</sub>  | GHHE <u>A</u> ELK*                           | 6.00 | 962.02 | 1631.7          |
| f <sub>9</sub>  | TE <u>A</u> EMK*                             | 4.53 | 749.83 | 1419.5          |
| f <sub>10</sub> | AL <u>E</u> LFR                              | 6.05 | 747.88 | 1417.6          |
| f <sub>11</sub> | AS <u>E</u> DLK*                             | 4.37 | 703.74 | 1373.4          |
| f <sub>12</sub> | ND <u>I</u> AAK*                             | 5.84 | 672.73 | 1342.4          |
| f <sub>13</sub> | <u>E</u> LG <u>F</u> QG                      | 4.00 | 649.69 | 1319.4          |
| f <sub>14</sub> | I <u>P</u> IK*                               | 8.75 | 511.66 | 1181.4          |
| f <sub>15</sub> | F <u>D</u> IK*                               | 5.84 | 450.49 | 1120.2          |
| f <sub>16</sub> | H <u>L</u> IK*                               | 8.76 | 438.52 | 1108.2          |
| f <sub>17</sub> | Y <u>K</u> *                                 | 8.59 | 351.40 | 1021.1          |
| f <sub>18</sub> | F <u>K</u> *                                 | 8.75 | 335.40 | 1005.1          |
| f <sub>19</sub> | H <u>K</u> *                                 | 8.76 | 325.40 | 995.06          |
| f <sub>20</sub> | K*                                           | 8.75 | 188.22 | 857.91          |

<sup>a</sup><http://proteome.ibi.unicamp.br/tools/pimw/index.htm>

**Table S2.** Observed tryptic fragment ions of myoglobin in Figure 9a.

| Monoisotopic mass<br>number of observed<br>ions ( $m/z$ ) | Calcd. mass<br>number | Fragment ion    |
|-----------------------------------------------------------|-----------------------|-----------------|
| 1965.9                                                    | 1966.2                | $f_1 + K^+$     |
| 1858.8                                                    | 1859.0                | $f_2 + H^+$     |
| 1747.7                                                    | 1747.0                | $f_1 - Y - OH$  |
| 1607.4                                                    | 1607.8                | $f_3 + H^+$     |
| 1545.3                                                    | 1544.7                | $f_4 + H^+$     |
| 1405.5                                                    | 1405.7                | $f_5 + H^+$     |
| 1314.9                                                    | 1314.5                | $f_6 + H^+$     |
| 1170.7                                                    | 1170.3                | $f_7 + H + K^+$ |
| 985.33                                                    | 985.02                | $f_8 + Na^+$    |
| 771.34                                                    | 770.88                | $f_{10} + Na^+$ |
| 705.62                                                    | 704.74                | $f_{11} + H^+$  |
| 439.71                                                    | 439.52                | $f_{16} + H^+$  |
| 357.11                                                    | 358.40                | $f_{18} + Na^+$ |
| 348.92                                                    | 348.40                | $f_{19} + Na^+$ |

**Table S3.** Observed <sup>Ru</sup>-CO-labeled fragment ions of tryptic myoglobin in Figure 10. Superscription “Ru” indicates <sup>Ru</sup>-CO-labeled fragment. K\* in the fragment ions represents a homoarginine residue.

| Monoisotopic mass<br>number of observed ions<br>( <i>m/z</i> ) | Calcd. mass<br>number | Fragment ion                       |
|----------------------------------------------------------------|-----------------------|------------------------------------|
| 2597.2                                                         | 2596.9                | f <sub>1</sub> <sup>Ru</sup>       |
| 2527.6                                                         | 2527.7                | f <sub>2</sub> <sup>Ru</sup>       |
| 2427.4                                                         | 2426.7                | f <sub>1</sub> <sup>Ru</sup> – K*  |
| 2259.9                                                         | 2260.5                | f <sub>3</sub> <sup>Ru</sup>       |
| 2213.8                                                         | 2213.4                | f <sub>4</sub> <sup>Ru</sup>       |
| 2104.9                                                         | 2104.3                | F <sub>3</sub> <sup>Ru</sup> – R   |
| 2074.2                                                         | 2074.4                | f <sub>5</sub> <sup>Ru</sup>       |
| 1904.1                                                         | 1904.3                | f <sub>5</sub> <sup>Ru</sup> – K*  |
| 1812.4                                                         | 1813.0                | f <sub>6</sub> <sup>Ru</sup> – K*  |
| 1664.6                                                         | 1663.8                | f <sub>7</sub> <sup>Ru</sup>       |
| 1632.5                                                         | 1631.7                | f <sub>8</sub> <sup>Ru</sup>       |
| 1493.7                                                         | 1493.6                | f <sub>7</sub> <sup>Ru</sup> – K*  |
| 1419.3                                                         | 1419.5                | f <sub>9</sub> <sup>Ru</sup>       |
| 1373.8                                                         | 1373.4                | f <sub>11</sub> <sup>Ru</sup>      |
| 1341.8                                                         | 1342.4                | f <sub>12</sub> <sup>Ru</sup>      |
| 1319.7                                                         | 1319.4                | f <sub>13</sub> <sup>Ru</sup>      |
| 1260.3                                                         | 1260.4                | f <sub>10</sub> <sup>Ru</sup> – R  |
| 1203.3                                                         | 1203.2                | f <sub>11</sub> <sup>Ru</sup> – K* |
| 1181.6                                                         | 1181.4                | f <sub>14</sub> <sup>Ru</sup>      |
| 1120.5                                                         | 1120.2                | f <sub>15</sub> <sup>Ru</sup>      |
| 1108.0                                                         | 1108.2                | f <sub>16</sub> <sup>Ru</sup>      |
| 1022.0                                                         | 1021.1                | f <sub>17</sub> <sup>Ru</sup>      |
| 995.08                                                         | 995.06                | f <sub>19</sub> <sup>Ru</sup>      |
| 950.37                                                         | 950.00                | f <sub>15</sub> <sup>Ru</sup> – K* |
| 857.91                                                         | 857.91                | f <sub>20</sub> <sup>Ru</sup>      |
| 834.50                                                         | 834.90                | f <sub>18</sub> <sup>Ru</sup> – K* |

**Table S4.** Predicted tryptic fragment ions of lysozyme and ubiquitin with their mass number. The shading characters indicate basic amino acid residues. The underline indicates acidic amino acid residues. K\* in the amino acid sequences represents a homoarginine residue. The all mass numbers are monoisotopic mass.

| Lysozyme Sequence                                                                   | M      |
|-------------------------------------------------------------------------------------|--------|
| f <sub>L1R</sub> <sup>u</sup> NLCNIPCSALLSSDITASVNC <b>A</b> K*                     | 3220.6 |
| f <sub>L2</sub> <sup>Ru</sup> NT <u>D</u> GST <u>D</u> YGILQINSR                    | 2423.5 |
| f <sub>L3</sub> <sup>Ru</sup> IV <u>S</u> <u>D</u> GNGMNAWVAVR                      | 2345.6 |
| f <sub>L4</sub> <sup>Ru</sup> FESNFNTQATNR                                          | 2098.7 |
| f <sub>L5</sub> <sup>Ru</sup> GYSLGNWVCA <b>A</b> K*                                | 2037.2 |
| f <sub>L6</sub> <sup>Ru</sup> GT <u>D</u> VQAWIR                                    | 1704.9 |
| f <sub>L7</sub> <sup>Ru</sup> WWCN <u>D</u> GR                                      | 1662.8 |
| f <sub>L8</sub> <sup>Ru</sup> CE <u>L</u> AA <b>A</b> M <b>K</b> *                  | 1604.8 |
| f <sub>L9</sub> <sup>Ru</sup> HGL <u>D</u> NYR                                      | 1543.6 |
| f <sub>L10</sub> <sup>Ru</sup> TPGSR                                                | 1185.2 |
| f <sub>L11</sub> <sup>Ru</sup> VFGR                                                 | 1147.3 |
| f <sub>L12</sub> <sup>Ru</sup> GCR                                                  | 1051.1 |
| f <sub>L13</sub> <sup>Ru</sup> C <b>K</b> *                                         | 1048.1 |
| f <sub>L14</sub> <sup>Ru</sup> NR                                                   | 957.99 |
| f <sub>L15</sub> <sup>Ru</sup> <b>K</b> *                                           | 857.91 |
| f <sub>L16</sub> <sup>Ru</sup> <b>R</b>                                             | 843.90 |
| f <sub>L17</sub> <sup>Ru</sup> L                                                    | 800.87 |
| Ubiquitine Sequence                                                                 | M      |
| f <sub>U1R</sub> <sup>u</sup> TIT <u>L</u> EV <u>E</u> PSD <u>T</u> IENV <b>K</b> * | 2499.7 |
| f <sub>U2</sub> <sup>Ru</sup> T <u>L</u> S <u>D</u> YNIQ <b>K</b> *                 | 1792.9 |
| f <sub>U3</sub> <sup>Ru</sup> <u>E</u> STLHLVLR                                     | 1736.9 |
| f <sub>U4</sub> <sup>Ru</sup> <u>E</u> GIP <u>P</u> <u>D</u> QQR                    | 1708.8 |
| f <sub>U5</sub> <sup>Ru</sup> MQIFV <b>K</b> *                                      | 1476.7 |
| f <sub>U6</sub> <sup>Ru</sup> Q <u>L</u> EDGR                                       | 1386.4 |
| f <sub>U7</sub> <sup>Ru</sup> LIFAG <b>K</b> *                                      | 1359.5 |
| f <sub>U8</sub> <sup>Ru</sup> TLTG <b>K</b> *                                       | 1230.3 |
| f <sub>U9</sub> <sup>Ru</sup> IQD <b>K</b> *                                        | 1214.3 |
| f <sub>U10</sub> <sup>Ru</sup> LR                                                   | 957.05 |
| f <sub>U11</sub> <sup>Ru</sup> <b>A</b> K*                                          | 929.00 |
| f <sub>U12</sub> <sup>Ru</sup> GG                                                   | 801.81 |

**Table S5.** Observed <Ru>-CO-labeled tryptic fragment ions of protein mixture in Figure 11. Superscription “Ru” indicates <Ru>-CO-labeled fragment. Subscriptions “M, L, U” indicate the initial letter of each protein. K\* in the fragment ions represents a homoarginine residue.

| Monoisotopic mass number of observed ions ( $m/z$ ) | Calcd. mass number | Fragment ion               |
|-----------------------------------------------------|--------------------|----------------------------|
| 3219.9                                              | 3220.6             | f <sub>L1</sub>            |
| 3179.3                                              | 3178.6             | f <sub>L1</sub> – guanidyl |
| 2595.8                                              | 2596.9             | f <sub>M1</sub>            |
| 2528.9                                              | 2527.7             | f <sub>M2</sub>            |
| 2499.3                                              | 2499.7             | f <sub>U1</sub>            |
| 2422.3                                              | 2423.5             | f <sub>L2</sub>            |
| 2344.7                                              | 2345.6             | f <sub>L3</sub>            |
| 2276.5                                              | 2276.5             | f <sub>M3</sub>            |
| 2213.3                                              | 2213.4             | f <sub>M4</sub>            |
| 2171.7                                              | 2171.4             | f <sub>M4</sub> – guanidyl |
| 2120.0                                              | 2120.5             | f <sub>M3</sub> – R        |
| 2098.2                                              | 2098.2             | f <sub>L4</sub>            |
| 2073.9                                              | 2074.4             | f <sub>M5</sub>            |
| 2036.7                                              | 2037.2             | f <sub>L5</sub>            |
| 1983.3                                              | 1983.2             | f <sub>M6</sub>            |
| 1904.5                                              | 1904.4             | f <sub>M5</sub> – K*       |
| 1866.8                                              | 1867.2             | f <sub>L5</sub> – K*       |
| 1816.5                                              | 1816.2             | f <sub>M6</sub> – K*       |
| 1792.7                                              | 1792.9             | f <sub>U2</sub>            |
| 1737.2                                              | 1736.9             | f <sub>U3</sub>            |
| 1708.8                                              | 1708.8             | f <sub>U4</sub>            |
| 1705.2                                              | 1704.9             | f <sub>L6</sub>            |
| 1663.6                                              | 1663.8             | f <sub>M7</sub>            |
| 1631.8                                              | 1631.7             | f <sub>M8</sub>            |
| 1604.3                                              | 1604.8             | f <sub>L8</sub>            |
| 1543.8                                              | 1543.6             | f <sub>L9</sub>            |
| 1506.2                                              | 1506.6             | f <sub>L7</sub> – R        |
| 1476.3                                              | 1476.7             | f <sub>U5</sub>            |

**Table S5.** (Continued) .

| Monoisotopic mass number of observed ions ( $m/z$ ) | Calcd. mass number | Fragment ion                        |
|-----------------------------------------------------|--------------------|-------------------------------------|
| 1458.7                                              | 1458.7             | f <sub>U5</sub> – H <sub>2</sub> O  |
| 1419.6                                              | 1419.5             | f <sub>M9</sub>                     |
| 1417.0                                              | 1417.6             | f <sub>M10</sub>                    |
| 1373.4                                              | 1373.4             | f <sub>M11</sub>                    |
| 1359.4                                              | 1359.5             | f <sub>U7</sub>                     |
| 1300.8                                              | 1300.4             | f <sub>M12</sub> – guanidyl         |
| 1277.9                                              | 1277.4             | f <sub>M13</sub> – guanidyl         |
| 1261.2                                              | 1261.4             | f <sub>M10</sub> – R                |
| 1230.2                                              | 1230.3             | f <sub>U8</sub>                     |
| 1214.1                                              | 1214.3             | f <sub>U9</sub>                     |
| 1184.9                                              | 1185.2             | f <sub>L10</sub>                    |
| 1147.6                                              | 1147.3             | f <sub>L11</sub>                    |
| 1120.7                                              | 1120.2             | f <sub>M15</sub>                    |
| 1077.8                                              | 1078.1             | f <sub>M15</sub> – guanidyl         |
| 1061.0                                              | 1061.1             | f <sub>L12</sub>                    |
| 1021.4                                              | 1021.1             | f <sub>M17</sub>                    |
| 1005.5                                              | 1005.1             | f <sub>M18</sub>                    |
| 994.92                                              | 995.06             | f <sub>M19</sub>                    |
| 976.50                                              | 976.10             | f <sub>L13</sub> – guanidyl         |
| 957.05                                              | 957.05             | f <sub>U10</sub>                    |
| 929.03                                              | 929.00             | f <sub>U11</sub>                    |
| 857.92                                              | 857.91             | f <sub>M20</sub> , f <sub>L15</sub> |
| 843.36                                              | 843.90             | f <sub>L16</sub>                    |
| 824.75                                              | 824.85             | f <sub>M19</sub> – K*               |
| 800.50                                              | 800.87             | f <sub>L17</sub>                    |
| 744.64                                              | 744.76             | f <sub>U12</sub> – G                |
| 687.33                                              | 686.73             | c <sub>0</sub>                      |
| 644.52                                              | 644.13             | a <sub>0</sub>                      |
